# Supplementary material for: The Effectiveness of Manual Therapy in the Cervical Spine and Diaphragm, in Combination with Breathing Reeducation Exercises, in Patients with Non-Specific Chronic Neck Pain: Protocol for Development of Outcome Measures and a Randomized Controlled Trial
Source: MDPI journal article supplement (doi:10.3390/diagnostics12112690), 2022-11-04
Supplement: s1 [file s1]

**Table S1.** Schedule of enrollment, intervention and assessments. BREx: Breathing Reeducation Exercises, CP: Conventional Physiotherapy, CMT: Cervical Manual Therapy, DMT: Diaphragmatic Manual Therapy, sDMT: Sham Diaphragmatic Manual Therapy, STT: Soft Tissue Techniques

|                                           | STUDY PERIOD    |              |                 |            |                  |
|-------------------------------------------|-----------------|--------------|-----------------|------------|------------------|
|                                           | Enrollment      | Allocation   | Post-allocation |            | Close-out        |
| TIMEPOINT                                 | -t <sub>1</sub> | Baseline (0) | 0-4 weeks       | 4-12 weeks | 12 week endpoint |
| <b>ENROLLMENT:</b>                        |                 |              |                 |            |                  |
| Eligibility screen                        | X               |              |                 |            |                  |
| Informed consent                          | X               |              |                 |            |                  |
| <i>Randomization</i>                      | X               |              |                 |            |                  |
| Allocation                                |                 | X            |                 |            |                  |
| <b>INTERVENTIONS:</b>                     |                 |              |                 |            |                  |
| <i>Intervention A: CMT-DMT- STT- BREx</i> |                 |              | ◄————►          |            |                  |
| <i>Intervention B: CMT- sDMT- STT</i>     |                 |              | ◄————►          |            |                  |
| <i>Intervention C: CP</i>                 |                 |              | ◄————►          |            |                  |
| <i>All groups: Self-managed exercises</i> |                 |              |                 | ◄————►     |                  |
| <b>ASSESSMENTS:</b>                       |                 |              |                 |            |                  |
| <i>Baseline</i>                           |                 | X            |                 |            |                  |
| <i>4 weeks</i>                            |                 |              | X               |            |                  |
| <i>12 weeks</i>                           |                 |              |                 |            | X                |
